# Supplementary figures and images for: Influences of environment, human activity, and climate on the invasion of Ageratina adenophora (Spreng.) in Southwest China
Source: PeerJ journal article supplement (doi:10.7717/peerj.14902), 2023-03-09

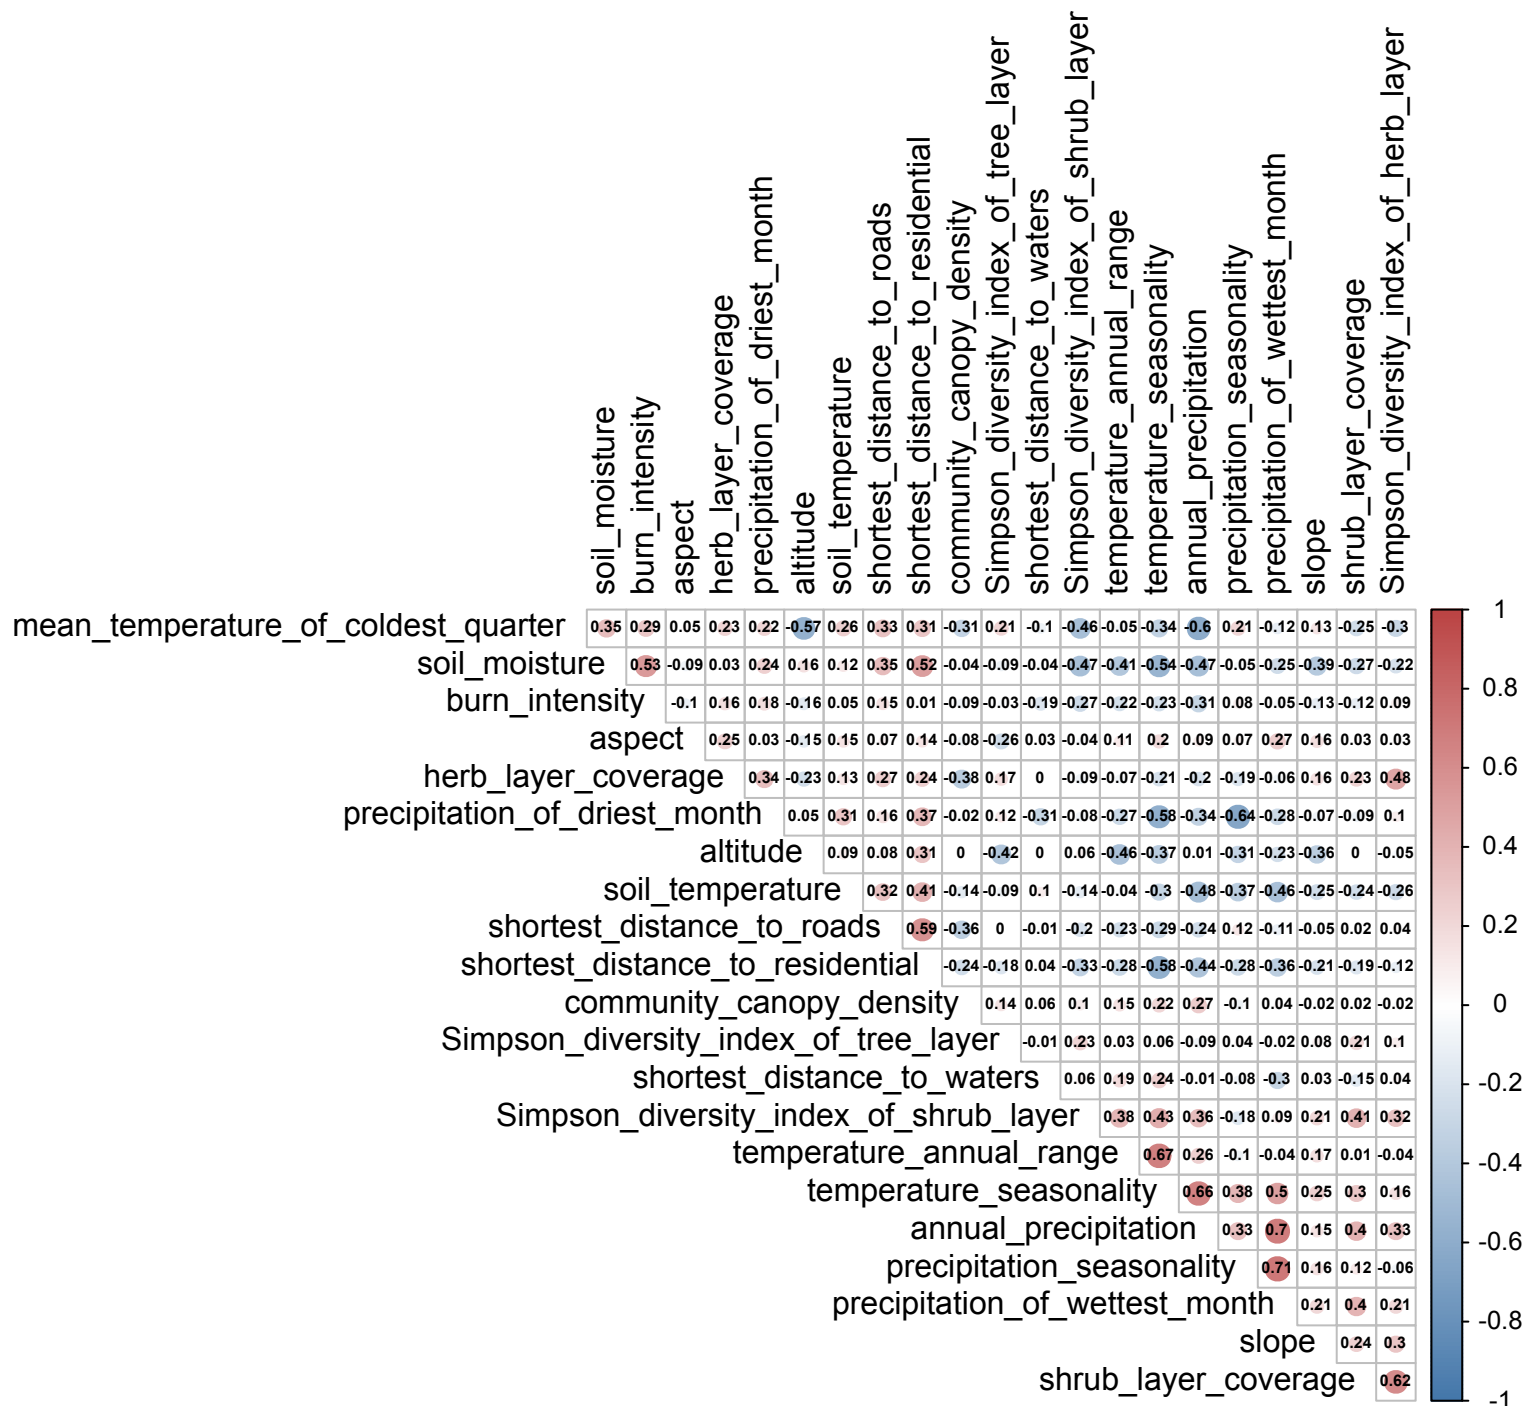

Supplement: file_1.zip [file file_1.zip]
